# Supplementary material for: Atrogin-1 Deficiency Leads to Myopathy and Heart Failure in Zebrafish
Source: MDPI journal article supplement (doi:10.3390/ijms17020187), 2016-01-30
Supplement: s1 [file s1]

# Supplementary Materials: Atrogin-1 Deficiency Leads to Myopathy and Heart Failure in Zebrafish

Anja Bühler, Monika Kustermann, Tiziana Bummer, Wolfgang Rottbauer, Marco Sandri and Steffen Just

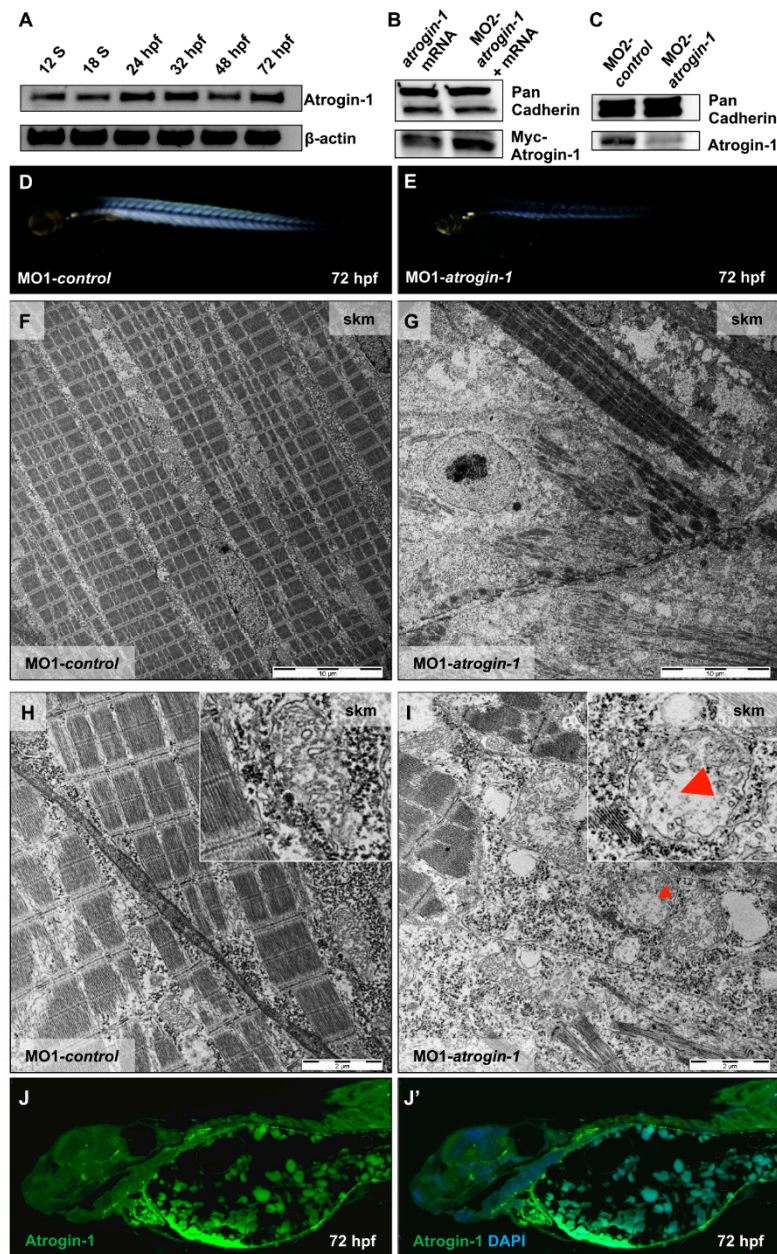

**Figure S1.** (A) RT-PCR for atrogin-1 and  $\beta$ -actin on wild-type on zebrafish cDNA from 12-Somite stage (S) until 72 hpf; (B) Western blot analysis using an anti-Myc antibody after atrogin-1 mRNA and MO2-atrogin-1 + atrogin-1 mRNA injection; (C) Immunoblot analysis using an anti-Atrogin-1 antibody after MO1-control and MO2-atrogin-1 injection; (D,E) Lateral views of control injected (D) and MO1-atrogin-1 injected embryos (E) showing birefringence at 72 hpf; (F–I) Electron micrographs of skeletal muscle cells (skm) of Atrogin-1 morphants (G,I) and embryos injected with control Morpholino (F,H) at 72 hpf. (J,J') Immunofluorescent staining against Atrogin-1 on paraffin sections, in lateral view of wild-type embryo at 72 hpf, nuclei are counterstained with DAPI.
